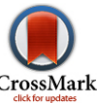

## Correction

# Correction: TGF- $\beta$ Prevents Phosphate-Induced Osteogenesis through Inhibition of BMP and Wnt/ $\beta$ -Catenin Pathways

The *PLOS ONE* Staff

There are errors in the Funding section. The correct funding information is as follows: This study has been supported by ISCIII and Fondos FEDER (FIS PI11/02055), “Proyecto de Excelencia P09-CTS-5205” from Consejería de Economía, Ciencia y Empresa from Junta de Andalucía, PI-0127 from Consejería de Salud, Junta de Andalucía and UE Grant from Framework Programme 7 Syskid (FP7-241544). The funders had no role in study design, data collection and analysis, decision to publish, or preparation of the manuscript.

## Reference

1. Guerrero F, Herencia C, Almadén Y, Martínez-Moreno JM, Montes de Oca A, et al. (2014) TGF- $\beta$  Prevents Phosphate-Induced Osteogenesis through Inhibition of BMP and Wnt/ $\beta$ -Catenin Pathways. *PLoS ONE* 9(2): e89179. doi:10.1371/journal.pone.0089179.

**Citation:** The *PLOS ONE* Staff (2014) Correction: TGF- $\beta$  Prevents Phosphate-Induced Osteogenesis through Inhibition of BMP and Wnt/ $\beta$ -Catenin Pathways. *PLoS ONE* 9(6): e101910. doi:10.1371/journal.pone.0101910

**Published:** June 27, 2014

**Copyright:** © 2014 The *PLOS ONE* Staff. This is an open-access article distributed under the terms of the Creative Commons Attribution License, which permits unrestricted use, distribution, and reproduction in any medium, provided the original author and source are credited.
